# Supplementary material for: European Breast Cancer Service Screening Outcomes: A First Balance Sheet of the Benefits and Harms
Source: Oxford University Press journal article supplement (doi:10.1158/1055-9965.epi-13-0320), 2014-07-01
Supplement: 10559965epi130320-sup-111209_2_supp_2030273_mp04hf.doc [file 10559965epi130320-sup-111209_2_supp_2030273_mp04hf.doc]

Appendix .

EUROSCREEN quantified the benefits and harms of breast cancer screening based on a review of observational studies of the published results of European, population-based, mammographic screening programmes.

Outcomes of service screening in Europe were assessed with breast cancer mortality reduction as the principal benefit, and overdiagnosis and false positive test results as principal harms.

The pooled estimates of breast cancer mortality reduction among invited women were 25% and 31% in incidence-based mortality studies and in case-control studies, respectively; and 38% and 48% among women actually screened.

The combined estimate of overdiagnosis for screened women derived from European studies considered as correctly adjusted for lead time and underlying trend was 6.5% of the expected incidence in the absence of screening.

For women undergoing ten biennial screening tests, the cumulative risk of a false positive test followed only by non-invasive assessment was estimated at 17%, with 3% having an invasive assessment.

Collective evidence from service screening in Europe shows that the chance of a woman’s life being saved by population-based mammography screening of appropriate quality is greater than the chance of receiving an overdiagnosis because of screening.

Communication methods should be improved to raise women’s awareness of benefits and harms, and to make information more accessible, relevant and comprehensible.

Research is needed in order to reduce the negative side effects of screening (such as overdiagnosis and false positive rates), most likely including tailored approaches and a better knowledge of the natural history of the disease.

Further evaluation of service screening outcomes in the near future would benefit from the implementation of European coordinated action.
